# Supplementary material
Source: HighWire-hosted journal article supplement (https://qualitysafety.bmj.com/content/31/7/493)
Supplement: inline-supplementary-material-4 [file inline-supplementary-material-4.pdf]

**Supplemental Table 1. Item Percent Positive Scores and Percentages of Missing Data and *Does Not Apply/Don't Know (DNA/DK)* Responses**

| Measures                                                                                                 | Hospital         |                  | Medical Office   |                  |
|----------------------------------------------------------------------------------------------------------|------------------|------------------|------------------|------------------|
|                                                                                                          | % Positive Score | % Missing/DNA/DK | % Positive Score | % Missing/DNA/DK |
| <b>Empowerment to Improve Efficiency (5 items)</b>                                                       |                  |                  |                  |                  |
| We are asked for our opinions about proposed changes to the way we do our work.                          | 62               | 2                | 55               | 2                |
| We are involved in making decisions about changes to our work processes.                                 | 59               | 2                | 52               | 2                |
| We are encouraged to come up with ideas for more efficient ways to do our work.                          | 73               | 1                | 65               | 1                |
| We are provided with the time to find ways to make our work more efficient.                              | 50               | 2                | 40               | 2                |
| We are given opportunities to try out solutions to workflow problems.                                    | 62               | 2                | 55               | 3                |
| <b>Efficiency and Waste Reduction (6 items)</b>                                                          |                  |                  |                  |                  |
| We examine how we do our work to get rid of unnecessary steps.                                           | 51               | 3                | 43               | 3                |
| Supplies are kept where we can find them quickly.                                                        | 78               | 2                | 85               | 1                |
| We try to find ways to reduce waste (such as wasted time, materials, steps, etc.) in how we do our work. | 67               | 2                | 63               | 2                |
| In our [unit/office], we are working to improve patient flow.                                            | 79               | 16               | 79               | 6                |
| We look for more efficient ways to do our work.                                                          | 76               | 2                | 72               | 3                |
| We focus on eliminating unnecessary tests and procedures for patients.                                   | 62               | 30               | 68               | 23               |
| <b>Patient Centeredness and Efficiency (5 items)</b>                                                     |                  |                  |                  |                  |
| [In our unit], we take steps to reduce patient wait time.                                                | 85               | 20               | 73               | 9                |
| We ask for patient or family member input on ways to make patient visits more efficient.                 | 68               | 29               | 41               | 20               |
| We are responsive to patient or family member concerns about the patient's care.                         | 95               | 19               | 92               | 10               |
| Patient and family member preferences have led to changes                                                | 67               | 27               | 44               | 23               |

| Measures                                                                                                                                          | Hospital         |                  | Medical Office   |                  |
|---------------------------------------------------------------------------------------------------------------------------------------------------|------------------|------------------|------------------|------------------|
|                                                                                                                                                   | % Positive Score | % Missing/DNA/DK | % Positive Score | % Missing/DNA/DK |
| in our workflow.                                                                                                                                  |                  |                  |                  |                  |
| We invite patients to serve on advisory panels or committees to help us improve the patient care experience.                                      | 37               | 52               | 19               | 43               |
| <b>[Hospital: Management] [Medical Office: Owner, Managing Partner, Leadership] Support for Improving Efficiency and Reducing Waste (6 items)</b> |                  |                  |                  |                  |
| Communicates that it is everyone's job to look for ways to improve work processes.                                                                | 81               | 4                | 63               | 5                |
| Takes action to address workflow problems that are brought to his or her attention.                                                               | 77               | 4                | 64               | 6                |
| Recognizes us for our ideas to improve efficiency.                                                                                                | 72               | 4                | 52               | 7                |
| Provides us with reports on our [unit/office] performance.                                                                                        | 81               | 6                | 51               | 10               |
| Emphasizes the importance of using regularly collected data to improve our work processes.                                                        | 75               | 7                | 47               | 13               |
| Places a high priority on doing work efficiently <b>without</b> compromising patient care.                                                        | 82               | 9                | 74               | 7                |
| <b>Overall Ratings of Healthcare Quality (4 items)</b>                                                                                            |                  |                  |                  |                  |
| Patient Centered—Is responsive to individual patient preferences, needs, and values                                                               | 68               | 4                | 62               | 3                |
| Effective—Provides services based on scientific knowledge to all who could benefit                                                                | 65               | 5                | 62               | 4                |
| Timely—Minimizes waits and potentially harmful delays                                                                                             | 58               | 4                | 45               | 4                |
| Efficient—Ensures cost-effective care (avoids waste, overuse, and misuse of services)                                                             | 53               | 5                | 44               | 4                |
| <b>Experience With Activities to Improve Efficiency (10 items)</b>                                                                                |                  |                  |                  |                  |

| Measures                                                                                                  | Hospital         |                  | Medical Office   |                  |
|-----------------------------------------------------------------------------------------------------------|------------------|------------------|------------------|------------------|
|                                                                                                           | % Positive Score | % Missing/DNA/DK | % Positive Score | % Missing/DNA/DK |
| I received training on how to identify waste and inefficiencies in my work.                               | 48               | 3                | 33               | 3                |
| I helped to map a workflow process to identify wasted time, materials, steps in a process, etc.           | 36               | 3                | 27               | 4                |
| I shadowed/followed patients in this [hospital/office] to identify ways to improve their care experience. | 17               | 3                | 14               | 4                |
| I looked at visual displays or graphs to see how well my [unit/office] was performing.                    | 63               | 3                | 27               | 3                |
| I made a suggestion to management about improving an inefficient work process.                            | 64               | 4                | 62               | 4                |
| I made a suggestion to management about improving patients' care experiences.                             | 55               | 7                | 51               | 7                |
| I helped to implement an activity to improve efficiency.                                                  | 51               | 7                | 43               | 7                |
| I served on a team or committee to make a work process more efficient.                                    | 36               | 7                | 24               | 6                |
| I reviewed the costs associated with an activity designed to improve efficiency.                          | 24               | 7                | 13               | 6                |
| I monitored data to figure out how well an activity to improve efficiency was working.                    | 28               | 8                | 16               | 7                |

**Supplemental Table 2. Hospital and Medical Multilevel Confirmatory Factor Analysis Results**

| Composite Measures                                                                                                                                                                                       | Hospital |               |                            |                             | Medical Office |               |                            |                             |
|----------------------------------------------------------------------------------------------------------------------------------------------------------------------------------------------------------|----------|---------------|----------------------------|-----------------------------|----------------|---------------|----------------------------|-----------------------------|
|                                                                                                                                                                                                          | ICC(1)   | Design Effect | Within-Site Factor Loading | Between-Site Factor Loading | ICC(1)         | Design Effect | Within-Site Factor Loading | Between-Site Factor Loading |
| <b>Empowerment to Improve Efficiency (3 items)</b>                                                                                                                                                       |          |               |                            |                             |                |               |                            |                             |
| We are involved in making decisions about changes to our work processes.                                                                                                                                 | 0.05     | 4.96          | 0.85                       | 0.98                        | 0.13           | 2.84          | 0.82                       | 0.99                        |
| We are encouraged to come up with ideas for more efficient ways to do our work.                                                                                                                          | 0.04     | 4.19          | 0.85                       | 0.94                        | 0.16           | 3.20          | 0.83                       | 0.88                        |
| We are given opportunities to try out solutions to workflow problems.                                                                                                                                    | 0.05     | 4.90          | 0.86                       | 1.00                        | 0.14           | 2.91          | 0.80                       | 0.97                        |
| <b>Efficiency and Waste Reduction (3 items)</b>                                                                                                                                                          |          |               |                            |                             |                |               |                            |                             |
| We try to find ways to reduce waste (such as wasted time, materials, steps, etc.) in how we do our work.                                                                                                 | 0.04     | 4.16          | 0.77                       | 0.95                        | 0.14           | 3.00          | 0.74                       | 0.79                        |
| In our [unit/office], we are working to improve patient flow.                                                                                                                                            | 0.05     | 4.46          | 0.81                       | 0.92                        | 0.13           | 2.71          | 0.81                       | 0.92                        |
| We focus on eliminating unnecessary tests and procedures for patients.                                                                                                                                   | 0.05     | 4.10          | 0.69                       | 1.00                        | 0.14           | 2.54          | 0.66                       | 0.70                        |
| <b>Patient Centeredness and Efficiency (3 items)</b>                                                                                                                                                     |          |               |                            |                             |                |               |                            |                             |
| In our [unit/office], we take steps to reduce patient wait time.                                                                                                                                         | 0.05     | 4.35          | 0.75                       | 0.90                        | 0.15           | 2.97          | 0.71                       | 0.66                        |
| We ask for patient or family member input on ways to make patient visits more efficient.                                                                                                                 | 0.06     | 4.47          | 0.65                       | 0.82                        | 0.22           | 3.42          | 0.68                       | 0.91                        |
| Patient and family member preferences have led to changes in our workflow.                                                                                                                               | 0.05     | 4.18          | 0.64                       | 1.00                        | 0.21           | 3.25          | 0.72                       | 1.00                        |
| <b>Management Support for Improving Efficiency and Reducing Waste (4 items)</b>                                                                                                                          |          |               |                            |                             |                |               |                            |                             |
| [Hospital: My supervisor, manager, or clinical leader]<br>[Medical office: Owners, managing partners, leadership]<br>Takes action to address workflow problems that are brought to his or her attention. | 0.03     | 3.44          | 0.87                       | 0.94                        | 0.18           | 2.39          | 0.79                       | 0.99                        |
| Recognizes us for our ideas to improve efficiency.                                                                                                                                                       | 0.03     | 3.37          | 0.89                       | 1.00                        | 0.19           | 2.47          | 0.83                       | 1.00                        |
| Provides us with reports on our unit performance.                                                                                                                                                        | 0.04     | 4.08          | 0.69                       | 0.69                        | 0.25           | 2.89          | 0.70                       | 0.74                        |
| Places a high priority on doing work efficiently <b>without</b> compromising patient care.                                                                                                               | 0.04     | 3.75          | 0.78                       | 0.95                        | 0.16           | 2.25          | 0.65                       | 0.99                        |

Note: Separate multilevel confirmatory factor analyses were conducted for the hospital items and the medical office items.

**Supplemental Table 3. Average Percent Positive Scores at the Hospital Level and Medical Office Level on the Final Measures**

| Measures                                                                                                                                     | Hospital |     | Medical Office |     |
|----------------------------------------------------------------------------------------------------------------------------------------------|----------|-----|----------------|-----|
|                                                                                                                                              | Mean     | SD  | Mean           | SD  |
| <b>Composite Measures</b>                                                                                                                    |          |     |                |     |
| Empowerment to Improve Efficiency (3 items)                                                                                                  | 64%      | 9%  | 59%            | 16% |
| Efficiency and Waste Reduction (3 items)                                                                                                     | 69%      | 9%  | 72%            | 13% |
| Patient Centeredness and Efficiency (3 items)                                                                                                | 73%      | 8%  | 54%            | 16% |
| [Hospital: Management][Medical Office: Owner, Managing Partner, Leadership]<br>Support for Improving Efficiency and Reducing Waste (4 items) | 78%      | 6%  | 62%            | 19% |
| <b>Overall Ratings of Healthcare Quality</b>                                                                                                 |          |     |                |     |
| Patient Centered—Is responsive to individual patient preferences, needs, and values                                                          | 67%      | 9%  | 64%            | 19% |
| Effective—Provides services based on scientific knowledge to all who could benefit                                                           | 64%      | 10% | 63%            | 22% |
| Timely—Minimizes waits and potentially harmful delays                                                                                        | 58%      | 10% | 46%            | 24% |
| Efficient—Ensures cost-effective care (avoids waste, overuse, and misuse of services)                                                        | 52%      | 10% | 46%            | 22% |
| <b>Experience With Activities to Improve Efficiency</b>                                                                                      |          |     |                |     |
| I received training on how to identify waste and inefficiencies in my work.                                                                  | 48%      | 12% | 35%            | 19% |
| I helped to map a workflow process to identify wasted time, materials, steps in a process, etc.                                              | 37%      | 10% | 29%            | 18% |
| I shadowed/followed patients in this [hospital/office] to identify ways to improve their care experience.                                    | 18%      | 9%  | 15%            | 14% |
| I looked at visual displays or graphs to see how well my [unit/office] was performing.                                                       | 63%      | 12% | 30%            | 25% |
| I made a suggestion to management about improving an inefficient work process.                                                               | 64%      | 7%  | 62%            | 20% |
| I made a suggestion to management about improving patients' care experiences.                                                                | 56%      | 7%  | 53%            | 20% |
| I served on a team or committee to make a work process more efficient.                                                                       | 37%      | 8%  | 25%            | 16% |
| I monitored data to figure out how well an activity to improve efficiency was working.                                                       | 29%      | 8%  | 17%            | 16% |
| <b>Average Score for Experience with Activities</b>                                                                                          | 44%      | 6%  | 33%            | 13% |

Note: SD = standard deviation
